# Supplementary material for: Short-term, Low-Dose Etoposide in Refractory Adult-Onset Still’s Disease-Associated Macrophage Activation Syndrome, a Case Series Study
Source: Research Square preprint supplement (doi:10.21203/rs.3.rs-1129785/v1), 2021-12-10
Supplement: Supplementary file 1 [file 745e4cbbc1622fa1a6b72e81.docx]

Supplementary materials

Table1.Clinical manifestation before and after 2-week treatment of low dose etoposide in refractory AOSD associated MAS patients

|  | D0 | D7 | *P*1(D0, vs D7) | D21 | *P*2(D0,vs. D21) |
| --- | --- | --- | --- | --- | --- |
| White blood cell (×109/L) | 6.43(2.34-16.81) | 3.60(2.52-5.75) | 0.075 | 7.81(5.26-12.40） | 0.526 |
| Neutrophil (×109/L) | 3.30(1.25-10.88) | 2.40(1.54-5.28) | 0.242 | 4.07(2.46-10.32) | 0.765 |
| Hemoglobin (g/L) | 104(96-119) | 100(84-109) | <0.0001 | 109(91-118) | 0.082 |
| Platelet (×109/L) | 82(49-142) | 143(59-227) | 0.018 | 205(159-272) | <0.0001 |
| Alanine aminotransferase (U/L) | 357(164-650) | 102(67-420) | 0.049 | 51(24-219) | 0.001 |
| Aspartate aminotransferase (U/L) | 218(127-492) | 44(31-209) | 0.008 | 45(16-149) | 0.001 |
| Triglycerides(mmol/L) | 2.02(1.68-4.06) | 1.87(1.40-3.11) | 0.016 | 1.97(1.55-2.76) | 0.285 |
| Fibrinogen(g/L) | 1.40(1.20-2.35) | 1.76(1.20-2.35) | 0.166 | 1.87(1.60-2.48) | 0.056 |
| Ferritin(ng/mL)* | 1928(1500-10975) | 1500(975-2195) | 0.005 | 733(443-1500)) | 0.006 |

*The upper limit of ferritin test was 1,500 ng/mL in Renji Hospital before year 2015.

Values are presented as the number (%) or the mean ± SD.

Table 2. Treatment of refractory AOSD-MAS patients during the 2-week period

|  | Etoposide group  n=17 | Control group  n=11 | P |
| --- | --- | --- | --- |
| Max dose of methylprednisolone (mg/ d) | 300 (160-300) | 625(300-1000) | 0.047 |
| Average dose of methylprednisolone (mg/d) | 140 (90-218) | 200(143-300) | 0.002 |
| Intravenous immuimmunogloblin(%) | 11(84.62) | 7(63.63) | 0.239 |
| calcineurin inhibitor (%) | - | 9 | - |
| Tocilizumab (%) | - | 2 | - |

Values are presented as the number (%) or the mean ± SD
